# Supplementary material
Source: PubMed Central journal article supplement (PMC6204690)
Supplement: zjm999096140s1.pdf [file zjm999096140s1.pdf]

## Supplemental Material

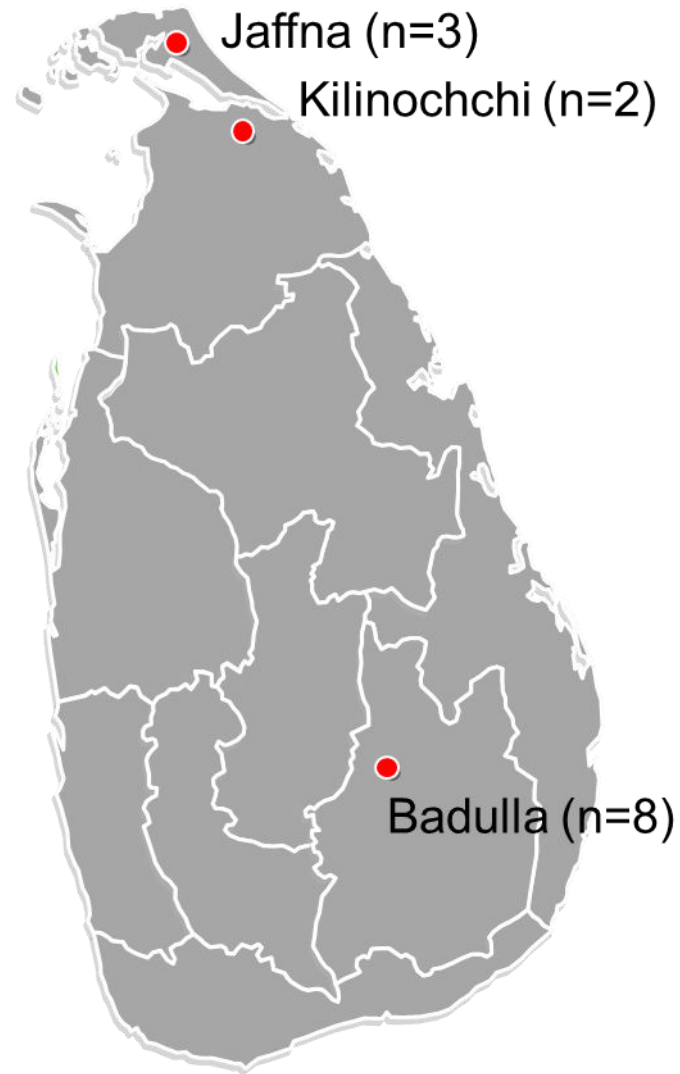

**Fig. S1.** Map showing the sampling locations. Cattle with clinical babesiosis were sampled in the Badulla, Kilinochchi, and Jaffna districts in Sri Lanka.

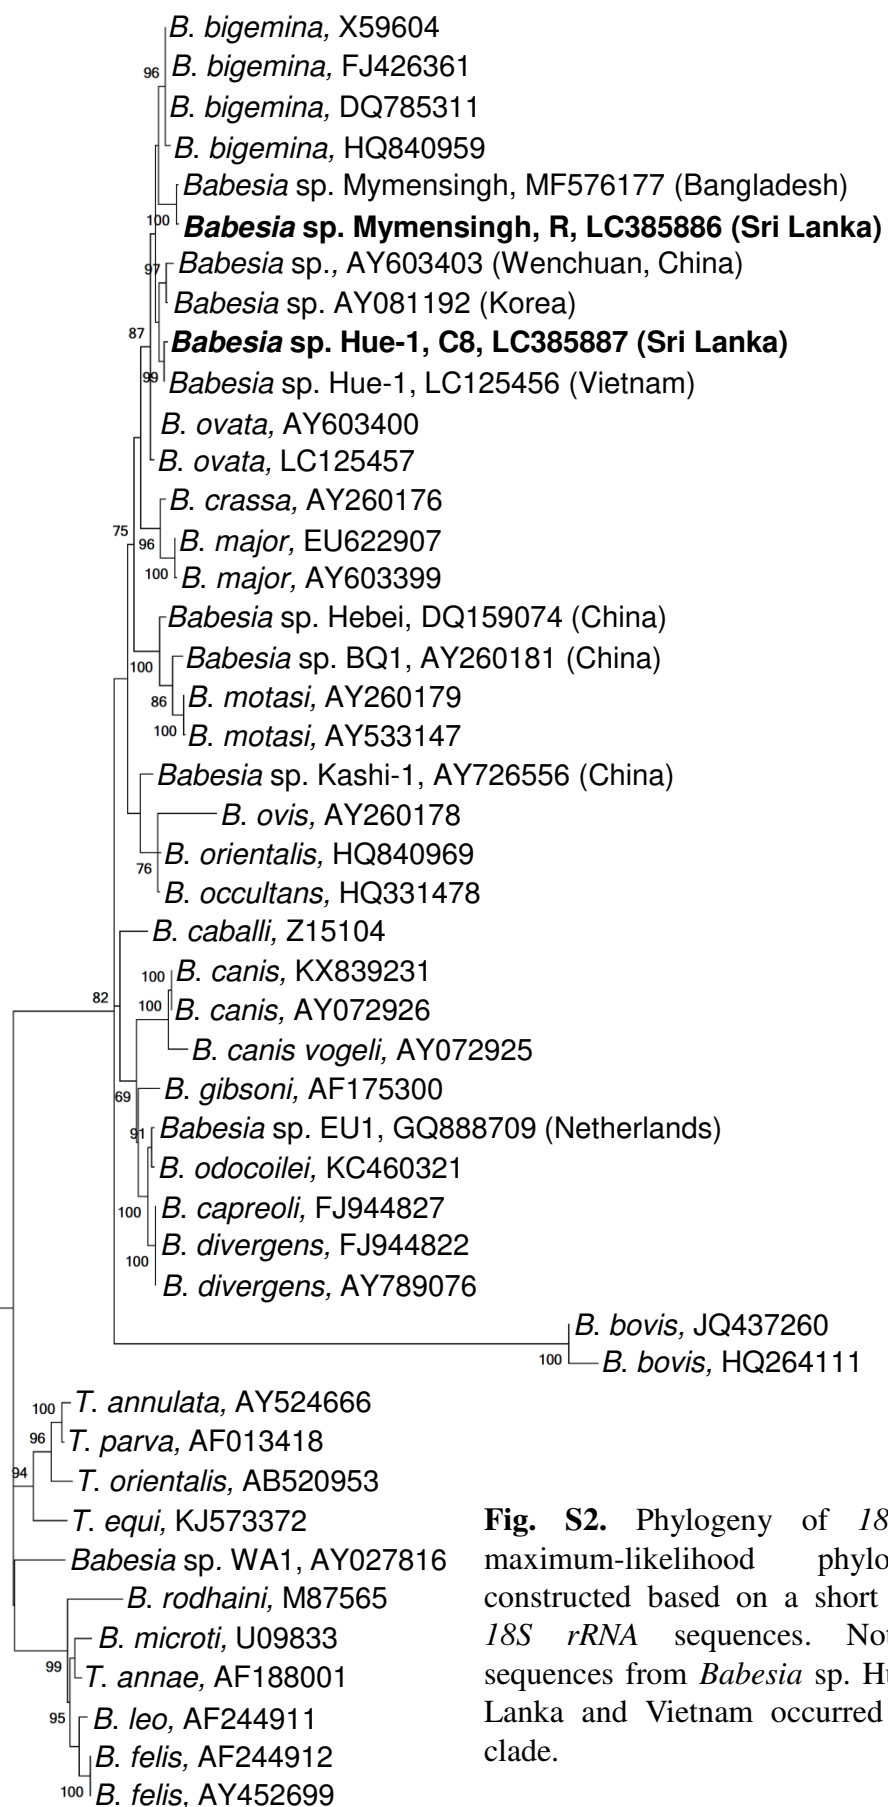

**Fig. S2.** Phylogeny of 18S rRNA. A maximum-likelihood phylogeny was constructed based on a short alignment of 18S rRNA sequences. Note that the sequences from *Babesia* sp. Hue-1 from Sri Lanka and Vietnam occurred in the same clade.

**Table S1.** Primers used in diagnostic PCR assays

| Pathogen              | Target gene   | Primer sequence (5' - 3') <sup>a</sup> |                                   | Amplicon size (bp) | Reference |
|-----------------------|---------------|----------------------------------------|-----------------------------------|--------------------|-----------|
|                       |               | Forward                                | Reverse                           |                    |           |
| <i>B. bovis</i>       | <i>rap-1</i>  | TCAACAACGTA CTCTATATGGCTACC            | CTACCGACCAGAACCTTCTTCACCAT        | 298                | (1)       |
| <i>B. bigemina</i>    | <i>ama-1</i>  | TACTGTGACGAGGACGGATC                   | CCTCAAAAGCAGATTCGAGT              | 211                | (2)       |
| <i>B. ovata</i>       | <i>ama-1</i>  | GATACGAGGCTGTCGGTAGC                   | AGTATAGGTGAGCATCAGTG              | 504                | (3)       |
| <i>Th. annulata</i>   | <i>tams-1</i> | ATGCTGCAAATGAGGAT                      | GGA CTGATGAGAAGACGATGAG           | 768                | (4)       |
| <i>Th. orientalis</i> | <i>mpsp</i>   | CTTTCCTAGGATACTTCCT                    | ACGGCAAGTGGTGAGAACT               | 776                | (5)       |
| <i>Tr. theileri</i>   | <i>catl</i>   | CGTCTCTGGCTCCGGTCAAAC                  | TTAAAGCTTCCACGAGTTCTTGATGATCCAGTA | 289                | (6)       |
| <i>A. marginale</i>   | <i>msp5</i>   | GTGTTCTGGGGTACTCCTATGTGAACAAG          | AAGCATGTGACCGCTGACAACTTAAACAG     | 547                | (7)       |

<sup>a</sup> All parasite species were detected by single-step PCR, although the *B. bovis*-, *B. bigemina*-, and *A. marginale*-specific PCR assays were originally described as nested PCR assays.

**Table S2.** PCR detection of *Babesia*, *Theileria*, *Trypanosoma*, and *Anaplasma* species in clinical cases of bovine babesiosis in Sri Lanka

| No.   | Animal ID | <i>B. bovis</i> | <i>B. bigemina</i> | <i>B.ovata</i> | <i>Th. annulata</i> | <i>Th. orientalis</i> | <i>Tr.theileri</i> | <i>A. marginale</i> |
|-------|-----------|-----------------|--------------------|----------------|---------------------|-----------------------|--------------------|---------------------|
| 1     | I         | +               | -                  | -              | +                   | -                     | +                  | -                   |
| 2     | L1        | -               | +                  | -              | -                   | +                     | +                  | -                   |
| 3     | L2        | -               | +                  | -              | -                   | -                     | +                  | -                   |
| 4     | R         | -               | -                  | -              | -                   | +                     | +                  | -                   |
| 5     | S         | +               | +                  | -              | -                   | +                     | +                  | -                   |
| 6     | T1        | +               | +                  | -              | -                   | +                     | +                  | -                   |
| 7     | T2        | +               | +                  | -              | -                   | -                     | +                  | -                   |
| 8     | V         | +               | +                  | -              | -                   | -                     | +                  | -                   |
| 9     | C2        | -               | +                  | -              | +                   | +                     | -                  | -                   |
| 10    | C5        | +               | -                  | -              | +                   | +                     | -                  | -                   |
| 11    | C6        | +               | -                  | -              | +                   | +                     | -                  | -                   |
| 12    | C7        | +               | +                  | -              | -                   | -                     | -                  | -                   |
| 13    | C8        | +               | +                  | +              | +                   | +                     | -                  | +                   |
| Total |           | 9               | 9                  | 1              | 5                   | 8                     | 8                  | 1                   |

PCR, polymerase chain reaction; ID, identification; +, positive; -, negative

## REFERENCES

- 1.Figueroa JV, Chieves LP, Johnson GS, Buening GM. 1993. Multiplex polymerase chain reaction based assay for the detection of *Babesia bigemina*, *Babesia bovis* and *Anaplasma marginale* DNA in bovine blood. *Vet Parasitol* 50:69–81.
- 2.Sivakumar T, Altangerel K, Battsetseg B, Battur B, AbouLaila M, Munkhjargal T, Yoshinari T, Yokoyama N, Igarashi I. 2012a. Genetic detection of *Babesia bigemina* from Mongolian cattle using *apical membrane antigen-1* gene based PCR technique. *Vet Parasitol* 187:17–22.
- 3.Sivakumar T, Tagawa M, Yoshinari T, Ybanez AP, Igarashi I, Ikehara Y, Hata H, Kondo S, Matsumoto K, Inokuma H, Yokoyama N. 2012b. PCR detection of *Babesia ovata* from cattle reared in Japan and clinical significance of coinfection with *Theileria orientalis*. *J Clin Microbiol* 50:2111–2113.
- 4.Kirvar E, Ilhan T, Katzer, F, Hooshmand-Rad P, Zwegarth E, Gerstenberg C, Phipps P, Brown CGD. 2000. Detection of *Theileria annulata* in cattle and vector ticks by PCR using the Tams1 gene sequences. *Parasitology* 120:245–254.
- 5.Ota N, Mizuno D, Kuboki N, Igarashi I, Nakamura Y, Yamashina H, Hanzaike T, Fujii K, Onoe S, Hata H, Kondo S, Matsui S, Koga M, Matsumoto K, Inokuma H, Yokoyama N. 2009. Epidemiological survey of *Theileria orientalis* infection in grazing cattle in the Eastern Part of Hokkaido, Japan. *J Vet Med Sci* 71:937–944.
- 6.Rodrigues AC, Garcia HA, Ortiz PA, Cortez AP, Martinkovic F, Paiva F, Batista JS, Minervino AH, Campaner M, Pral EM, Alfieri SC, Teixeira M.M. 2010. Cysteine proteases of *Trypanosoma (Megatrypanum) theileri*: cathepsin L-like gene sequences as targets for phylogenetic analysis, genotyping diagnosis. *Parasitol Int* 59:318–325.
- 7.Ybañez AP, Sivakumar T, Battsetseg B, Battur B, Altangerel K, Matsumoto K, Yokoyama N, Inokuma H. 2013. Specific molecular detection and characterization of *Anaplasma marginale* in Mongolian cattle. *J Vet Med Sci*. 75:399–406.
